# Supplementary material
Source: HighWire-hosted journal article supplement (https://tech.snmjournals.org/highwire/filestream/10686/field_highwire_adjunct_files/0/264694_Supplemental_Data.pdf)
Supplement: 264694_Supplemental_Data.pdf [file 264694_Supplemental_Data.pdf]

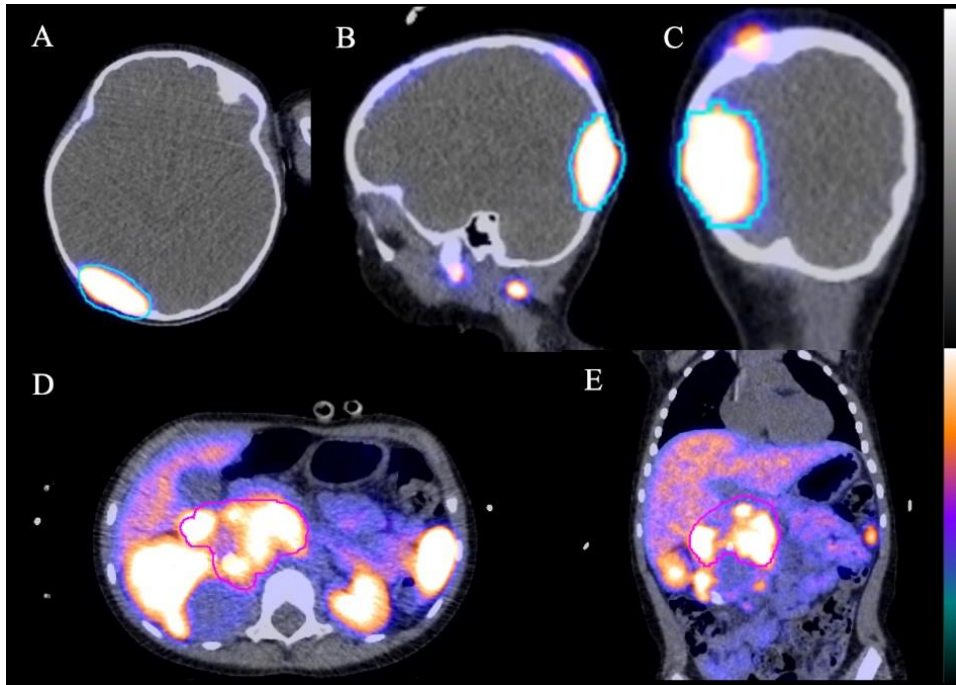

**Supplemental Figure 1 (A-E):** Better tumor volume delineation on DOTATATE PET/CT for external beam radiotherapy or proton beam therapies target volume definitions.
